# Supplementary material for: Estimation of the Mechanism of Adrenal Action of Endocrine-Disrupting Compounds Using a Computational Model of Adrenal Steroidogenesis in NCI-H295R Cells
Source: Hindawi journal article supplement (doi:10.1155/2016/4041827), 2016-01-01
Supplement: f1 [file 4041827.f1.pdf]

A supplementary document of

**Estimation of the Mechanism of Adrenal Action of  
Endocrine-disrupting Compounds Using a Computational Model of  
Adrenal Steroidogenesis in NCI-H295R Cells.**

R. Saito, N. Terasaki, M. Yamazaki, N. Masutomi, N. Tsutsui, and M. Okamoto.

Journal of Toxicology, 2016: Article ID 4041827.

## **Contents**

### **1. Abbreviations**

### **2. A computational model of adrenal steroidogenesis in NCI-H295R cells**

**Cell proliferation**

**Cholesterol transport and intracellular distribution**

**C<sub>21</sub>-steroid hormone biosynthesis pathway**

**Diffusional transport of steroid hormones**

**Kinetic equations**

### **3. Model parameters**

**Table S1. Fixed parameters and the sensitivity for fitting score**

**Table S2. Initial values of variable parameters**

### **4. References**

## 1. Abbreviations

### *Steroid hormones*

PREG: pregnenolone

HPREG: 17 $\alpha$ -hydroxypregnenolone

DHEA: dehydroepiandrosterone

PROG: progesterone

HPROG: 17 $\alpha$ -hydroxyprogesterone

DIONE: androstenedione

DCORTICO: 11-deoxycorticosterone

DCORT: 11-deoxycortisol

CORTICO: corticosterone

CORT: cortisol

ALDO: aldosterone

TESTO: testosterone

E1: estrone

E2: 17 $\beta$ -estradiol

### *Proteins of adrenal steroidogenic pathway*

CYP11A1: cholesterol side chain cleavage enzyme

CYP17H: 17 $\alpha$ -hydroxylase of CYP17

CYP17L: C<sub>17-20</sub> lyase of CYP17

HSD3B2: 3 $\beta$ -hydroxysteroid dehydrogenase

CYP21A2: 21-hydroxylase

CYP11B1: 11 $\beta$ -hydroxylase

CYP11B2: 18-hydroxylase

HSD17B3: 17 $\beta$ -hydroxysteroid dehydrogenase.

CYP19A1: aromatase

## 2. A computational model of adrenal steroidogenesis in NCI-H295R cells

### *Cell proliferation*

Equations to estimate the proliferation of NCI-H295R cells have been proposed by previous studies [1, 2]. In this model, the dynamics of the total number of cells ( $N_{\text{cell}}$ ) and total cell volume ( $V_{\text{cell}}$ ) were implemented by the following equations:

$$N_{\text{cell}}(t) = N_{\text{cell}}(-72) \cdot \exp[k_p \cdot (t + t_{\text{incubation}})] \quad \dots \text{(Eq. 1)}$$

$$V_{\text{cell}}(t) = V_{\text{indiv}} \cdot N_{\text{cell}} \quad \dots \text{(Eq. 2)}$$

where,  $N_{\text{cell}}(-72)$  is the initial number of NCI-H295R cells per well before incubation ( $6 \times 10^5$  cells),  $k_p$  is the cell proliferation rate of NCI-H295R cells (0.00878 1/h),  $t_{\text{incubation}}$  is the incubation time until stimulation (72 h),  $t$  is the culture time after stimulation, and  $V_{\text{indiv}}$  is the mean cell volume of individual NCI-H295R cells ( $1,499 \mu\text{m}^3$ ).

### *Cholesterol transport and intracellular distribution*

Cholesterol transport and the intracellular localization pathway were modified as a part of the ACTH-stimulated cortisol secretion model described by Dempsher and colleagues [3]. Intracellular cholesterol was separated into five states based on localization in the adrenal cells. There are stored cholesterol esters in the lipid droplets (CHOS), free cytosolic cholesterol (CHOC), free mitochondrial cholesterol (CHOM), free mitochondrial cholesterol close to CYP11A1 enzymes (CHON), and free mitochondrial cholesterol remote from CYP11A1 enzymes (CHOR). Cholesterols (CHOL) almost always exist as a cholesterol ester (CE) in extracellular culture medium. Therefore, imported CHOL from the culture medium is first stored in lipid droplets (transition to CHOS from medium CHOL). CHOS is transformed to free CHOL by cholesterol ester hydrolase (CEH) and distributed to the cytosolic space (transition from CHOS to CHOC). CHOC is transported into mitochondria from the cytosol by StAR protein (transition from CHOC to CHOM). CHOM is continuously translocated in the vicinity of CYP11A1 enzymes by StAR (transition from CHOM to CHON), so that CHON is available for the adrenal steroidogenesis pathway. On the other hand, CHOM also passively recedes from CYP11A1 enzymes (transition from CHOM to CHOR). Moreover, the oxysterol biosynthesis pathway was incorporated as a bypass of the steroidogenesis pathway, which was proposed by Breen et al [2]. In fact, the total mass balance of cholesterol and all steroids is not preserved in

this *in vitro* system. However, the oxysterol biosynthesis pathway and/or bypass pathway are expected to exist in NCI-H295R cells. In this model, the oxysterol biosynthesis pathway was defined to branch from CHOC to oxysterol (OXY). These variable parameters belonging to cholesterol transport and the intracellular transport system were described by the following ordinary differential equations (ODEs):

$$\frac{d[\text{CHOL}]_{\text{med}}}{dt} = -\frac{V_{\text{cell}}}{V_{\text{med}}} \cdot v_{\text{CholesterolTransport}} \quad \dots \text{ (ODE 1)}$$

$$\frac{d\text{CHOS}}{dt} = V_{\text{cell}} \cdot (v_{\text{CholesterolTransport}} - v_{\text{CEH}}) \quad \dots \text{ (ODE 2)}$$

$$\frac{d\text{CHOC}}{dt} = V_{\text{cell}} \cdot (v_{\text{CEH}} - v_{\text{MTR}} - v_{\text{OxysterolSynthesis}}) \quad \dots \text{ (ODE 3)}$$

$$\frac{d\text{CHOM}}{dt} = V_{\text{cell}} \cdot (v_{\text{MTR}} - v_{\text{acc}} - v_{\text{loc}}) \quad \dots \text{ (ODE 4)}$$

$$\frac{d\text{CHON}}{dt} = V_{\text{cell}} \cdot (v_{\text{loc}} - v_{\text{CYP11A1}}) \quad \dots \text{ (ODE 5)}$$

$$\frac{d\text{CHOR}}{dt} = V_{\text{cell}} \cdot v_{\text{acc}} \quad \dots \text{ (ODE 6)}$$

$$\frac{d\text{OXY}}{dt} = V_{\text{cell}} \cdot v_{\text{OxysterolSynthesis}} \quad \dots \text{ (ODE 7)}$$

where,  $V_{\text{med}}$  is the volume of culture medium (2 mL),  $v_{\text{CholesterolTransport}}$  is the cholesterol import rate into the cytosolic space from the extracellular culture medium,  $v_{\text{CEH}}$  is the enzymatic reaction rate of CEH,  $v_{\text{MTR}}$  is the mitochondrial transport rate by the StAR protein,  $v_{\text{OxysterolSynthesis}}$  is the reaction rate of oxysterol biosynthesis,  $v_{\text{acc}}$  is the passive diffusion rate from CYP11A1 enzymes,  $v_{\text{loc}}$  is the translocation rate close to CYP11A1 enzymes by StAR, and  $v_{\text{CYP11A1}}$  is the enzymatic reaction rate of the first adrenal steroidogenic enzyme, CYP11A1.

Net cholesterol concentration in intracellular space was calculated by a following equation:

$$[\text{CHOL}]_{\text{cell}} = \frac{(\text{CHOS} + \text{CHOC} + \text{CHOM} + \text{CHON} + \text{CHOR})}{V_{\text{cell}}} \quad \dots \text{ (Eq. 3)}$$

### *C<sub>21</sub>-steroid hormone biosynthesis pathway*

The C<sub>21</sub>-steroid hormone biosynthesis pathway includes 14 steroid hormones, PREG, HPREG, DHEA, PROG, HPROG, DIONE, TESTO, DCORTICO, DCORT, CORTICO, CORT, ALDO, E1 and E2, and 17 enzymatic reactions catalyzed by nine steroidogenic enzymes, CYP11A1, CYP17H, CYP17L, HSD3B2, CYP21A2, CYP11B1, CYP11B2, HSD17B3, and CYP19A1.

These variable parameters belonging to the adrenal steroidogenesis system were described by the following ODEs:

$$V_{\text{cell}} \cdot \frac{d[\text{PREG}]_{\text{cell}}}{dt} = \frac{V_{\text{cell}}^2}{V_{\text{cell}} + V_{\text{med}} \cdot q_{\text{PREG}}} \cdot (v_{\text{CYP11A1}} - v_{\text{A,CYP17H}} - v_{\text{A,HSD3B2}}) \quad \dots \text{ (ODE 8)}$$

$$V_{\text{cell}} \cdot \frac{d[\text{HPREG}]_{\text{cell}}}{dt} = \frac{V_{\text{cell}}^2}{V_{\text{cell}} + V_{\text{med}} \cdot q_{\text{HPREG}}} \cdot (v_{\text{A,CYP17H}} - v_{\text{A,CYP17L}} - v_{\text{B,HSD3B2}}) \quad \dots \text{ (ODE 9)}$$

$$V_{\text{cell}} \cdot \frac{d[\text{DHEA}]_{\text{cell}}}{dt} = \frac{V_{\text{cell}}^2}{V_{\text{cell}} + V_{\text{med}} \cdot q_{\text{DHEA}}} \cdot (v_{\text{A,CYP17L}} - v_{\text{C,HSD3B2}}) \quad \dots \text{ (ODE 10)}$$

$$V_{\text{cell}} \cdot \frac{d[\text{PROG}]_{\text{cell}}}{dt} = \frac{V_{\text{cell}}^2}{V_{\text{cell}} + V_{\text{med}} \cdot q_{\text{PROG}}} \cdot (v_{\text{A,HSD3B2}} - v_{\text{B,CYP17H}} - v_{\text{A,CYP21A2}}) \quad \dots \text{ (ODE 11)}$$

$$V_{\text{cell}} \cdot \frac{d[\text{HPROG}]_{\text{cell}}}{dt} = \frac{V_{\text{cell}}^2}{V_{\text{cell}} + V_{\text{med}} \cdot q_{\text{HPROG}}} \cdot (v_{\text{B,CYP17H}} + v_{\text{B,HSD3B2}} - v_{\text{B,CYP17L}} - v_{\text{B,CYP21A2}}) \quad \dots \text{ (ODE 12)}$$

$$V_{\text{cell}} \cdot \frac{d[\text{DIONE}]_{\text{cell}}}{dt} = \frac{V_{\text{cell}}^2}{V_{\text{cell}} + V_{\text{med}} \cdot q_{\text{DIONE}}} \cdot (v_{\text{B,CYP17L}} + v_{\text{C,HSD3B2}} - v_{\text{A,CYP19A1}} - v_{\text{A,HSD17B3}}) \quad \dots \text{ (ODE 13)}$$

$$V_{\text{cell}} \cdot \frac{d[\text{TESTO}]_{\text{cell}}}{dt} = \frac{V_{\text{cell}}^2}{V_{\text{cell}} + V_{\text{med}} \cdot q_{\text{TESTO}}} \cdot (v_{\text{A,HSD17B3}} - v_{\text{B,CYP19A1}}) \quad \dots \text{ (ODE 14)}$$

$$V_{\text{cell}} \cdot \frac{d[\text{DCORTICO}]_{\text{cell}}}{dt} = \frac{V_{\text{cell}}^2}{V_{\text{cell}} + V_{\text{med}} \cdot q_{\text{DCORTICO}}} \cdot (v_{\text{A,CYP21A2}} - v_{\text{A,CYP11B1}}) \quad \dots \text{ (ODE 15)}$$

$$V_{\text{cell}} \cdot \frac{d[\text{DCORT}]_{\text{cell}}}{dt} = \frac{V_{\text{cell}}^2}{V_{\text{cell}} + V_{\text{med}} \cdot q_{\text{DCORT}}} \cdot (v_{\text{B,CYP21A2}} - v_{\text{B,CYP11B1}}) \quad \dots \text{ (ODE 16)}$$

$$V_{\text{cell}} \cdot \frac{d[\text{CORTICO}]_{\text{cell}}}{dt} = \frac{V_{\text{cell}}^2}{V_{\text{cell}} + V_{\text{med}} \cdot q_{\text{CORTICO}}} \cdot (v_{\text{A,CYP11B1}} - v_{\text{CYP11B2}}) \quad \dots \text{ (ODE 17)}$$

$$V_{\text{cell}} \cdot \frac{d[\text{CORT}]_{\text{cell}}}{dt} = \frac{V_{\text{cell}}^2}{V_{\text{cell}} + V_{\text{med}} \cdot q_{\text{CORT}}} \cdot v_{\text{B,CYP11B1}} \quad \dots \text{ (ODE 18)}$$

$$V_{\text{cell}} \cdot \frac{d[\text{ALDO}]_{\text{cell}}}{dt} = \frac{V_{\text{cell}}^2}{V_{\text{cell}} + V_{\text{med}} \cdot q_{\text{ALDO}}} \cdot v_{\text{CYP11B2}} \quad \dots \text{ (ODE 19)}$$

$$V_{\text{cell}} \cdot \frac{d[\text{E1}]_{\text{cell}}}{dt} = \frac{V_{\text{cell}}^2}{V_{\text{cell}} + V_{\text{med}} \cdot q_{\text{E1}}} \cdot (v_{\text{A,CYP19A1}} - v_{\text{B,HSD17B3}}) \quad \dots \text{ (ODE 20)}$$

$$V_{\text{cell}} \cdot \frac{d[\text{E2}]_{\text{cell}}}{dt} = \frac{V_{\text{cell}}^2}{V_{\text{cell}} + V_{\text{med}} \cdot q_{\text{E2}}} \cdot (v_{\text{B,HSD17B3}} + v_{\text{B,CYP19A1}}) \quad \dots \text{ (ODE 21)}$$

where,  $q_x$  (dimensionless) is the equilibrium constant of steroid hormone x between the cytosol and extracellular culture medium and  $v_x$  ( $\mu\text{M/h}$ ) is the enzymatic reaction rate of

steroidogenic enzyme X.

### *Diffusional transport of steroid hormones*

Descriptions of all passive transport reactions of steroid hormones were based on the quasi-equilibrium reaction. Therefore, steroid concentrations in the culture medium were calculated from each cytosolic concentration and equilibrium constant.

$$[\text{PREG}]_{\text{med}} = q_{\text{PREG}} \cdot [\text{PREG}]_{\text{cell}} \quad \dots \text{ (Eq. 4)}$$

$$[\text{HPREG}]_{\text{med}} = q_{\text{HPREG}} \cdot [\text{HPREG}]_{\text{cell}} \quad \dots \text{ (Eq. 5)}$$

$$[\text{DHEA}]_{\text{med}} = q_{\text{DHEA}} \cdot [\text{DHEA}]_{\text{cell}} \quad \dots \text{ (Eq. 6)}$$

$$[\text{PROG}]_{\text{med}} = q_{\text{PROG}} \cdot [\text{PROG}]_{\text{cell}} \quad \dots \text{ (Eq. 7)}$$

$$[\text{HPROG}]_{\text{med}} = q_{\text{HPROG}} \cdot [\text{HPROG}]_{\text{cell}} \quad \dots \text{ (Eq. 8)}$$

$$[\text{DIONE}]_{\text{med}} = q_{\text{DIONE}} \cdot [\text{DIONE}]_{\text{cell}} \quad \dots \text{ (Eq. 9)}$$

$$[\text{TESTO}]_{\text{med}} = q_{\text{TESTO}} \cdot [\text{TESTO}]_{\text{cell}} \quad \dots \text{ (Eq. 10)}$$

$$[\text{DCORTICO}]_{\text{med}} = q_{\text{DCORTICO}} \cdot [\text{DCORTICO}]_{\text{cell}} \quad \dots \text{ (Eq. 11)}$$

$$[\text{DCORT}]_{\text{med}} = q_{\text{DCORT}} \cdot [\text{DCORT}]_{\text{cell}} \quad \dots \text{ (Eq. 12)}$$

$$[\text{CORTICO}]_{\text{med}} = q_{\text{CORTICO}} \cdot [\text{CORTICO}]_{\text{cell}} \quad \dots \text{ (Eq. 13)}$$

$$[\text{CORT}]_{\text{med}} = q_{\text{CORT}} \cdot [\text{CORT}]_{\text{cell}} \quad \dots \text{ (Eq. 14)}$$

$$[\text{ALDO}]_{\text{med}} = q_{\text{ALDO}} \cdot [\text{ALDO}]_{\text{cell}} \quad \dots \text{ (Eq. 15)}$$

$$[\text{E1}]_{\text{med}} = q_{\text{E1}} \cdot [\text{E1}]_{\text{cell}} \quad \dots \text{ (Eq. 16)}$$

$$[\text{E2}]_{\text{med}} = q_{\text{E2}} \cdot [\text{E2}]_{\text{cell}} \quad \dots \text{ (Eq. 17)}$$

## Kinetic equations

In this mathematical model of adrenal steroidogenesis in NCI-H295R cells, the flux velocities of molecular transportation and enzymatic reaction rates of steroidogenic enzymes were defined based on the first-order reaction and rapid-equilibrium enzyme kinetics, respectively, by the following equations:

$$v_{CholesterolTransport} = k^{CholesterolTransport} \cdot [CHOL]_{med} \cdot \frac{V_{med}}{V_{cell}} \quad \dots \text{(Eq. 18)}$$

$$v_{CEH} = k^{CEH} \cdot [CHOS]_{cell} \quad \dots \text{(Eq. 19)}$$

$$v_{OxysterolSynthesis} = k^{OxysterolSynthesis} \cdot [CHOC]_{cell} \quad \dots \text{(Eq. 20)}$$

$$v_{MTR} = k_f^{MTR} \cdot [CHOC]_{cell} - k_b^{MTR} \cdot [CHOM]_{cell} \quad \dots \text{(Eq. 21)}$$

$$v_{acc} = k_f^{acc} \cdot [CHOM]_{cell} - k_b^{acc} \cdot [CHOR]_{cell} \quad \dots \text{(Eq. 22)}$$

$$v_{loc} = k_f^{loc} \cdot [CHOM]_{cell} - k_b^{loc} \cdot [CHON]_{cell} \quad \dots \text{(Eq. 23)}$$

$$v_{CYP11A1} = \frac{V_{max}^{CYP11A1} \cdot [CHON]_{cell}}{[CHON]_{cell} + K_m^{CYP11A1}} \quad \dots \text{(Eq. 24)}$$

$$v_{A,CYP17H} = \frac{V_{maxA}^{CYP17H} \cdot \frac{[PREG]_{cell}}{K_{mA}^{CYP17H}}}{1 + \frac{[PREG]_{cell}}{K_{mA}^{CYP17H}} + \frac{[PROG]_{cell}}{K_{mB}^{CYP17H}}} \quad \dots \text{(Eq. 25)}$$

$$v_{B,CYP17H} = \frac{V_{maxB}^{CYP17H} \cdot \frac{[PROG]_{cell}}{K_{mB}^{CYP17H}}}{1 + \frac{[PREG]_{cell}}{K_{mA}^{CYP17H}} + \frac{[PROG]_{cell}}{K_{mB}^{CYP17H}}} \quad \dots \text{(Eq. 26)}$$

$$v_{A,CYP17L} = \frac{V_{maxA}^{CYP17L} \cdot \frac{[HPREG]_{cell}}{K_{mA}^{CYP17L}}}{1 + \frac{[HPREG]_{cell}}{K_{mA}^{CYP17L}} + \frac{[HPROG]_{cell}}{K_{mB}^{CYP17L}}} \quad \dots \text{(Eq. 27)}$$

$$v_{B,CYP17L} = \frac{V_{maxB}^{CYP17L} \cdot \frac{[HPROG]_{cell}}{K_{mB}^{CYP17L}}}{1 + \frac{[HPREG]_{cell}}{K_{mA}^{CYP17L}} + \frac{[HPROG]_{cell}}{K_{mB}^{CYP17L}}} \quad \dots \text{(Eq. 28)}$$

$$v_{A,HSD3B2} = \frac{V_{maxA}^{HSD3B2} \cdot \frac{[PREG]_{cell}}{K_{mA}^{HSD3B2}}}{1 + \frac{[PREG]_{cell}}{K_{mA}^{HSD3B2}} + \frac{[HPREG]_{cell}}{K_{mB}^{HSD3B2}} + \frac{[DHEA]_{cell}}{K_{mC}^{HSD3B2}}} \quad \dots \text{(Eq. 29)}$$



$$v_{B,HSD3B2} = \frac{V_{\max B}^{HSD3B2} \frac{[HPREG]_{\text{cell}}}{K_{mB}^{HSD3B2}}}{1 + \frac{[PREG]_{\text{cell}}}{K_{mA}^{HSD3B2}} + \frac{[HPREG]_{\text{cell}}}{K_{mB}^{HSD3B2}} + \frac{[DHEA]_{\text{cell}}}{K_{mC}^{HSD3B2}}} \quad \dots \text{ (Eq. 30)}$$

$$v_{C,HSD3B2} = \frac{V_{\max C}^{HSD3B2} \frac{[DHEA]_{\text{cell}}}{K_{mC}^{HSD3B2}}}{1 + \frac{[PREG]_{\text{cell}}}{K_{mA}^{HSD3B2}} + \frac{[HPREG]_{\text{cell}}}{K_{mB}^{HSD3B2}} + \frac{[DHEA]_{\text{cell}}}{K_{mC}^{HSD3B2}}} \quad \dots \text{ (Eq. 31)}$$

$$v_{A,CYP21A1} = \frac{V_{\max A}^{CYP21A1} \frac{[PROG]_{\text{cell}}}{K_{mA}^{CYP21A1}}}{1 + \frac{[PROG]_{\text{cell}}}{K_{mA}^{CYP21A1}} + \frac{[HPROG]_{\text{cell}}}{K_{mB}^{CYP21A1}}} \quad \dots \text{ (Eq. 32)}$$

$$v_{B,CYP21A1} = \frac{V_{\max B}^{CYP21A1} \frac{[HPROG]_{\text{cell}}}{K_{mB}^{CYP21A1}}}{1 + \frac{[PROG]_{\text{cell}}}{K_{mA}^{CYP21A1}} + \frac{[HPROG]_{\text{cell}}}{K_{mB}^{CYP21A1}}} \quad \dots \text{ (Eq. 33)}$$

$$v_{A,CYP11B1} = \frac{V_{\max A}^{CYP11B1} \frac{[DCORTICO]_{\text{cell}}}{K_{mA}^{CYP11B1}}}{1 + \frac{[DCORTICO]_{\text{cell}}}{K_{mA}^{CYP11B1}} + \frac{[DCORT]_{\text{cell}}}{K_{mB}^{CYP11B1}}} \quad \dots \text{ (Eq. 34)}$$

$$v_{B,CYP11B1} = \frac{V_{\max B}^{CYP11B1} \frac{[DCORT]_{\text{cell}}}{K_{mB}^{CYP11B1}}}{1 + \frac{[DCORTICO]_{\text{cell}}}{K_{mA}^{CYP11B1}} + \frac{[DCORT]_{\text{cell}}}{K_{mB}^{CYP11B1}}} \quad \dots \text{ (Eq. 35)}$$

$$v_{CYP11B2} = k^{CYP11B2} \cdot [CORTICO]_{\text{cell}} \quad \dots \text{ (Eq. 36)}$$

$$v_{A,HSD17B3} = \frac{V_{\max A}^{HSD17B3} \frac{[DIONE]_{\text{cell}}}{K_{mA}^{HSD17B3}}}{1 + \frac{[DIONE]_{\text{cell}}}{K_{mA}^{HSD17B3}} + \frac{[E1]_{\text{cell}}}{K_{mB}^{HSD17B3}}} \quad \dots \text{ (Eq. 37)}$$

$$v_{B,HSD17B3} = \frac{V_{\max B}^{HSD17B3} \frac{[E1]_{\text{cell}}}{K_{mB}^{HSD17B3}}}{1 + \frac{[DIONE]_{\text{cell}}}{K_{mA}^{HSD17B3}} + \frac{[E1]_{\text{cell}}}{K_{mB}^{HSD17B3}}} \quad \dots \text{ (Eq. 38)}$$

$$v_{A,CYP19A1} = \frac{V_{\max A}^{CYP19A1} \frac{[DIONE]_{\text{cell}}}{K_{mA}^{CYP19A1}}}{1 + \frac{[DIONE]_{\text{cell}}}{K_{mA}^{CYP19A1}} + \frac{[TESTO]_{\text{cell}}}{K_{mB}^{CYP19A1}}} \quad \dots \text{ (Eq. 39)}$$

$$v_{B,CYP19A1} = \frac{V_{\max B}^{CYP19A1} \frac{[TESTO]_{\text{cell}}}{K_{mB}^{CYP19A1}}}{1 + \frac{[DIONE]_{\text{cell}}}{K_{mA}^{CYP19A1}} + \frac{[TESTO]_{\text{cell}}}{K_{mB}^{CYP19A1}}} \quad \dots \text{ (Eq. 40)}$$

where  $k^X$  (1/h) is the rate constant of the first order reaction for metabolic flux X,  $V_{\max A}^X$  ( $\mu\text{M}/\text{h}$ ) is the maximum velocity of enzyme X for substrate A, and  $K_{mA}^X$  is the equilibrium dissociation constant of enzyme X for substrate A.

### 3. Model parameters

All static parameters in this model are described in Supplementary Table 1. Rate constants and the maximum velocity were estimated by fitting to experimental time-course data of the concentrations of cholesterol and all steroids. Equilibrium dissociation constants were extracted from previous biochemical studies. Equilibrium constants of each steroid transport were estimated in previous studies by Breen and colleagues [1, 2]. All initial values of variable parameters in this model are described in Supplementary Table 2. Initial values of cholesterol and the 14 steroid concentrations were used in each experimentally measured value, and every steroid concentration was assumed to rapidly reach the equilibrium state between the culture medium and intracellular space.

Table S1. Fixed parameters in the adrenal steroidogenesis model of NCI-H295R cells

| Parameter number | Model parameter            | Optimized value | Units                  | Sensitivity for the fitting objective function | Reference |
|------------------|----------------------------|-----------------|------------------------|------------------------------------------------|-----------|
| 1                | $k^{CholesterolTransport}$ | 0.0197596       | 1/h                    | 4.6234                                         | optimized |
| 2                | $k^{CEH}$                  | 0.302850        | 1/h                    | 0.0331                                         | optimized |
| 3                | $k_f^{MTR}$                | 11.7203         | 1/h                    | 1.4953                                         | optimized |
| 4                | $k_b^{MTR}$                | 202.531         | 1/h                    | 1.7737                                         | optimized |
| 5                | $k_f^{acc}$                | 5.17768         | 1/h                    | 3.1793                                         | optimized |
| 6                | $k_b^{acc}$                | 0.0404461       | 1/h                    | 1.8855                                         | optimized |
| 7                | $k_f^{loc}$                | 9.97234         | 1/h                    | 8.0399                                         | optimized |
| 8                | $k_b^{loc}$                | 2339.88         | 1/h                    | 5.8004                                         | optimized |
| 9                | $k^{OxysterolSynthesis}$   | 0.0654339       | 1/h                    | 1.3421                                         | optimized |
| 10               | $K_m^{CYP11A1}$            | 0.5             | $\mu\text{M}$          | 5.8000                                         | (4)       |
| 11               | $V_{max}^{CYP11A1}$        | 675.701         | $\mu\text{M}/\text{h}$ | 22.4750                                        | optimized |
| 12               | $K_{mA}^{CYP17H}$          | 0.25            | $\mu\text{M}$          | 0.2342                                         | (5)       |
| 13               | $K_{mB}^{CYP17H}$          | 0.45            | $\mu\text{M}$          | 0.2570                                         | (5)       |
| 14               | $V_{maxA}^{CYP17H}$        | 108.063         | $\mu\text{M}/\text{h}$ | 3.8388                                         | optimized |
| 15               | $V_{maxB}^{CYP17H}$        | 1050.21         | $\mu\text{M}/\text{h}$ | 0.2985                                         | optimized |
| 16               | $K_{mA}^{CYP17L}$          | 0.270           | $\mu\text{M}$          | 0.1274                                         | (6)       |
| 17               | $K_{mB}^{CYP17L}$          | 0.525           | $\mu\text{M}$          | 0.1597                                         | (7)       |

|    |                               |           |                 |         |           |
|----|-------------------------------|-----------|-----------------|---------|-----------|
| 18 | $V_{\max A}^{\text{CYP17L}}$  | 10.8710   | $\mu\text{M/h}$ | 0.2107  | optimized |
| 19 | $V_{\max B}^{\text{CYP17L}}$  | 69.7546   | $\mu\text{M/h}$ | 0.3717  | optimized |
| 20 | $K_{mA}^{\text{HSD3B2}}$      | 2.8       | $\mu\text{M}$   | 0.3626  | (8)       |
| 21 | $K_{mB}^{\text{HSD3B2}}$      | 3.5       | $\mu\text{M}$   | 0.4001  | (8)       |
| 22 | $K_{mC}^{\text{HSD3B2}}$      | 3.7       | $\mu\text{M}$   | 0.0929  | (8)       |
| 23 | $V_{\max A}^{\text{HSD3B2}}$  | 235.152   | $\mu\text{M/h}$ | 30.9490 | optimized |
| 24 | $V_{\max B}^{\text{HSD3B2}}$  | 1901.65   | $\mu\text{M/h}$ | 0.6361  | optimized |
| 25 | $V_{\max C}^{\text{HSD3B2}}$  | 525.917   | $\mu\text{M/h}$ | 0.1046  | optimized |
| 26 | $K_{mA}^{\text{CYP21A2}}$     | 1.5       | $\mu\text{M}$   | 0.1652  | (9)       |
| 27 | $K_{mB}^{\text{CYP21A2}}$     | 1.6       | $\mu\text{M}$   | 0.3853  | (9)       |
| 28 | $V_{\max A}^{\text{CYP21A2}}$ | 213.911   | $\mu\text{M/h}$ | 7.0023  | optimized |
| 29 | $V_{\max B}^{\text{CYP21A2}}$ | 544.496   | $\mu\text{M/h}$ | 1.9225  | optimized |
| 30 | $K_{mA}^{\text{CYP11B1}}$     | 2.50      | $\mu\text{M}$   | 0.1095  | (10)      |
| 31 | $K_{mB}^{\text{CYP11B1}}$     | 0.882     | $\mu\text{M}$   | 0.1042  | (11)      |
| 32 | $V_{\max A}^{\text{CYP11B1}}$ | 214.848   | $\mu\text{M/h}$ | 0.2427  | optimized |
| 33 | $V_{\max B}^{\text{CYP11B1}}$ | 36.9996   | $\mu\text{M/h}$ | 0.1781  | optimized |
| 34 | $k^{\text{CYP11B2}}$          | 0.0698923 | 1/h             | 0.1634  | optimized |
| 35 | $K_{mA}^{\text{HSD17B3}}$     | 0.7       | $\mu\text{M}$   | 0.1022  | (12)      |
| 36 | $K_{mB}^{\text{HSD17B3}}$     | 3.3       | $\mu\text{M}$   | 0.1111  | (12)      |
| 37 | $V_{\max A}^{\text{HSD17B3}}$ | 0.81059   | $\mu\text{M/h}$ | 0.1666  | optimized |
| 38 | $V_{\max B}^{\text{HSD17B3}}$ | 6.15932   | $\mu\text{M/h}$ | 0.1769  | optimized |
| 39 | $K_{mA}^{\text{CYP19A1}}$     | 0.215     | $\mu\text{M}$   | 0.0035  | (13)      |
| 40 | $K_{mB}^{\text{CYP19A1}}$     | 0.370     | $\mu\text{M}$   | 0.0003  | (13)      |
| 41 | $V_{\max A}^{\text{CYP19A1}}$ | 10.0091   | $\mu\text{M/h}$ | 0.7052  | optimized |
| 42 | $V_{\max B}^{\text{CYP19A1}}$ | 1.0e-6    | $\mu\text{M/h}$ | 0.0000  | optimized |
| 43 | $q_{\text{PREG}}$             | 0.0129    | dimensionless   | ---     | (2)       |
| 44 | $q_{\text{HPREG}}$            | 0.0605    | dimensionless   | ---     | (2)       |
| 45 | $q_{\text{DHEA}}$             | 0.0377    | dimensionless   | ---     | (2)       |
| 46 | $q_{\text{PROG}}$             | 0.0052    | dimensionless   | ---     | (2)       |
| 47 | $q_{\text{HPROG}}$            | 0.0212    | dimensionless   | ---     | (2)       |
| 48 | $q_{\text{DIONE}}$            | 0.0400    | dimensionless   | ---     | (2)       |
| 49 | $q_{\text{DCORTICO}}$         | 0.0412    | dimensionless   | ---     | (2)       |
| 50 | $q_{\text{DCORT}}$            | 0.0422    | dimensionless   | ---     | (2)       |
| 51 | $q_{\text{CORTICO}}$          | 0.0558    | dimensionless   | ---     | (2)       |

|    |                    |        |               |     |     |
|----|--------------------|--------|---------------|-----|-----|
| 52 | $q_{\text{CORT}}$  | 0.0676 | dimensionless | --- | (2) |
| 53 | $q_{\text{ALDO}}$  | 0.0911 | dimensionless | --- | (2) |
| 54 | $q_{\text{TESTO}}$ | 0.0443 | dimensionless | --- | (2) |
| 55 | $q_{\text{E1}}$    | 0.0267 | dimensionless | --- | (2) |
| 56 | $q_{\text{E2}}$    | 0.0351 | dimensionless | --- | (2) |

Table S2. Initial values of variable parameters in the adrenal steroidogenesis model of NCI-H295R cells.

| Compartment         | Molecular parameter name | Initial value | Unit          |
|---------------------|--------------------------|---------------|---------------|
| Culture medium      | CHOL                     | 81.1          | $\mu\text{M}$ |
| Culture medium      | PREG                     | 0.00085       | $\mu\text{M}$ |
| Culture medium      | HPREG                    | 0.06945       | $\mu\text{M}$ |
| Culture medium      | DHEA                     | 0.0           | $\mu\text{M}$ |
| Culture medium      | PROG                     | 0.00003       | $\mu\text{M}$ |
| Culture medium      | HPROG                    | 0.0           | $\mu\text{M}$ |
| Culture medium      | DIONE                    | 0.00080       | $\mu\text{M}$ |
| Culture medium      | DCORTICO                 | 0.0           | $\mu\text{M}$ |
| Culture medium      | DCORT                    | 0.0           | $\mu\text{M}$ |
| Culture medium      | CORTICO                  | 0.00011       | $\mu\text{M}$ |
| Culture medium      | CORT                     | 0.00003       | $\mu\text{M}$ |
| Culture medium      | ALDO                     | 0.00091       | $\mu\text{M}$ |
| Culture medium      | TESTO                    | 0.00080       | $\mu\text{M}$ |
| Culture medium      | E1                       | 0.00011       | $\mu\text{M}$ |
| Culture medium      | E2                       | 0.00121       | $\mu\text{M}$ |
| Intracellular space | OXY                      | 0.0           | $\text{nmol}$ |
| Intracellular space | CHOS                     | 16.08         | $\text{nmol}$ |
| Intracellular space | CHOC                     | 0.3503        | $\text{nmol}$ |
| Intracellular space | CHOM                     | 0.02943       | $\text{nmol}$ |
| Intracellular space | CHON                     | 0.0006431     | $\text{nmol}$ |
| Intracellular space | CHOR                     | 0.6350        | $\text{nmol}$ |
| Intracellular space | PREG                     | 0.008580      | $\text{nmol}$ |
| Intracellular space | HPREG                    | 0.0           | $\text{nmol}$ |
| Intracellular space | DHEA                     | 0.003165      | $\text{nmol}$ |

|                     |          |            |      |
|---------------------|----------|------------|------|
| Intracellular space | PROG     | 0.00002892 | nmol |
| Intracellular space | HPROG    | 0.00009361 | nmol |
| Intracellular space | DIONE    | 0.002115   | nmol |
| Intracellular space | DCORTICO | 0.0007598  | nmol |
| Intracellular space | DCORT    | 0.06871    | nmol |
| Intracellular space | CORTICO  | 0.002065   | nmol |
| Intracellular space | CORT     | 0.003114   | nmol |
| Intracellular space | ALDO     | 0.0        | nmol |
| Intracellular space | TESTO    | 0.0        | nmol |
| Intracellular space | E1       | 0.001895   | nmol |
| Intracellular space | E2       | 0.0003870  | nmol |

#### 4. References

1. Breen MS, Breen M, Terasaki N, Yamazaki M, Conolly RB. Computational model of steroidogenesis in human H295R cells to predict biochemical response to endocrine-active chemicals: model development for metyrapone. *Environ Health Perspect.* 2010; 118(2):265-72.
2. Breen M, Breen MS, Terasaki N, Yamazaki M, Lloyd AL, Conolly RB. Mechanistic computational model of steroidogenesis in H295R cells: role of oxysterols and cell proliferation to improve predictability of biochemical response to endocrine active chemical-metyrapone. *Toxicol Sci.* 2011; 123(1):80-93.
3. Dempsher DP, Gann DS, Phair RD. A mechanistic model of ACTH-stimulated cortisol secretion. *Am J Physiol.* 1984; 246(4 Pt 2):R587-96.
4. Warne PA, Greenfield NJ, Lieberman S. Modulation of the kinetics of cholesterol side-chain cleavage by an activator and by an inhibitor isolated from the cytosol of the cortex of bovine adrenals. *Proc Natl Acad Sci U S A.* 1983; 80(7):1877-81.
5. Beaudoin C, Lavallee B, Tremblay Y, et al. Modulation of 17alpha-hydroxylase/17,20-lyase activity of guinea pig cytochrome P450c17 by site-directed mutagenesis. *DNA Cell Biol.* 1998; 17(8):707-15.
6. Rosa S, Steigert M, Lang-Muritano M, l'Allemand D, Schoenle EJ, Biason-Lauber A. Clinical, genetic and functional characteristics of three novel CYP17A1 mutations causing combined 17alpha-hydroxylase/17,20-lyase deficiency. *Horm Res Paediatr.* 2010; 73(3):198-204.

7. Dalla Valle L, Ramina A, Vianello S, Belvedere P, Colombo L. Kinetic analysis of duodenal and testicular cytochrome P450c17 in the rat. *J Steroid Biochem Med Biol.* 1996; 58(5-6):577-84.
8. Thomas JL, Mason JJ, Brandt S, Spencer BR Jr, Norris W. Structure/function relationships responsible for the kinetic differences between human type 1 and type 2 3beta-hydroxysteroid dehydrogenase and for the catalysis of the type 1 activity. *J Biol Chem.* 2002; 277(45):42795-801.
9. Riepe FG, Hiort O, Sippell WG, Krone N, Holterhus PM. Functional and structural consequences of a novel point mutation in the CYP21A2 gene causing congenital adrenal hyperplasia: potential relevance of helix C for P450 oxidoreductase-21-hydroxylase interaction. *J Clin Endocrinol Metab.* 2008; 93(7):2891-5.
10. Fisher A, Fraser R, Mc Connell J, Davies E. Amino acid residue 147 of human aldosterone synthase and 11beta-hydroxylase plays a key role in 11beta-hydroxylation. *J Clin Endocrinol Metab.* 2000; 85(3):1261-6.
11. LaSala D, Shibanaka Y, Jeng AY. Coexpression of CYP11B2 or CYP11B1 with adrenodoxin and adrenodoxin reductase for assessing the potency and selectivity of aldosterone synthase inhibitors. *Anal Biochem.* 2009; 394(1):56-61.
12. Baker ME. Unusual evolution of 11beta- and 17beta-hydroxysteroid and retinol dehydrogenases. *BioEssays.* 1996; 18(1):63-70.
13. Corbin CJ, Mapes SM, Lee YM, Conley AJ. Structural and functional differences among purified recombinant mammalian aromatases: glycosylation, N-terminal sequence and kinetic analysis of human, bovine and the porcine placental and gonadal isozymes. *Mol Cell Endocrinol.* 2003; 206(1-2):147-57.
